# Supplementary material
Source: HighWire-hosted journal article supplement (https://jmg.bmj.com/content/56/6/413)
Supplement: inline-supplementary-material-2 [file inline-supplementary-material-2.pdf]

Supplementary Table 1. Primers utilized in this study.

|                           | Forward (5' → 3')             | Reverse (5' → 3')                    | Sequence primer    | AT | PS  | CN |
|---------------------------|-------------------------------|--------------------------------------|--------------------|----|-----|----|
| <Pyrosequencing analysis> |                               |                                      |                    |    |     |    |
| ZNF597:TSS-DMR            | GAAGAAGGATAGAAAGAAGATTGGGAGAT | biotin-CCCRCCCTCTCAATCACCTTACTC      | AAAGAAGATTGGGAGATA | 52 | 134 | 45 |
| ZNF597:3' DMR             | GGATATGGTTAGGTATATGGTTAAATTT  | biotin-TCAAAAAAATCCTAAATCTCCAACCTAAC | GGGTATYGGGAAGTGGT  | 52 | 227 | 45 |
| <Microsatellite analysis> |                               |                                      |                    |    |     |    |
| D16S521                   | GAGCGAGACTCCGTCTAAA           | CAGCAGCCTCAGGGTT                     |                    | 56 |     | 35 |
| D16S3027                  | ATATTTGGCATCTGGGG             | CCAGCATGAGTTGCTTT                    |                    | 52 |     | 35 |
| D16S418                   | TGTNAGGTATGAGACACTGC          | CACCTTCTTGCCTTTCATTC                 |                    | 56 |     | 35 |
| D16S3102                  | CATGGGACTCTGGCTAAC            | ATCGTGAATGACTGCCACAA                 |                    | 56 |     | 35 |
| D16S3103                  | GCTTTGAGTCTCCACATCTATGA       | GGCCAGCAGGTCTTCCTA                   |                    | 56 |     | 35 |
| D16S403                   | GTTTTCTCCCTGGGACATTT          | TATTCATTTGTGTGGGCATG                 |                    | 56 |     | 35 |
| D16S3100                  | CTTTTGCCTGGATGCTG             | TTAATGAAGTGTAACACATATGCAC            |                    | 56 |     | 35 |
| D16S3136                  | ATTGCCCTCAAGAACAGC            | GTGCTATGCCATCCCAG                    |                    | 56 |     | 35 |
| D16S3034                  | TAATCTAGTTAAAGATGCAACTGCC     | GCTCAGAAGTTTGTATGCC                  |                    | 56 |     | 35 |
| D16S514                   | CTATCCACTCACTTTCCAGG          | TCCCACTGATCATCTTCTC                  |                    | 56 |     | 35 |
| D16S3066                  | AGTCAGGACACGATGGTTTG          | CCCAGTTCCAATGGCAC                    |                    | 56 |     | 35 |
| D16S3049                  | GCAATGAAGGCAACAAAGT           | TTAAAAGACCTGGGGGAAT                  |                    | 52 |     | 35 |
| D16S3091                  | GGGAGATAGCCTTAACTTTCTTAC      | TGTTGCTAATAACACTAGGCCA               |                    | 56 |     | 35 |

AT: annealing temperature (°C); PS: product size (bp); CN: cycle numbers; R: A or G (purine); and Y: C or T (pyrimidine).

DMR: differentially methylated region.
